# Supplementary material for: Deposition of ZnO on bismuth species towards a rechargeable Zn-based aqueous battery
Source: Royal Society of Chemistry journal article supplement (doi:10.1039/c6cp04566a), 2016-01-01
Supplement: c6cp04566a1.pdf [file c6cp04566a1.pdf]

Electronic Supplementary Information for

**Deposition of ZnO on Bismuth Species Towards Rechargeable  
Zn-Based Aqueous Battery**

*JaeWook Shin,<sup>[†]</sup> Jung-Min You,<sup>[†]</sup> Jungwoo Z. Lee, Rajan Kumar, Lu Yin, Joseph Wang,\*  
and Y. Shirley Meng\**

Affiliation: University of California San Diego, NanoEngineering Department, 9500 Gilman  
Dr., (MC:0448), La Jolla, CA92093, USA

\*Corresponding author Tel.: +1 8588224247, Fax: +1 8585349553

Email address: [shmeng@ucsd.edu](mailto:shmeng@ucsd.edu), [josephwang@ucsd.edu](mailto:josephwang@ucsd.edu)

## 1. Supplementary methods

*Composite electrode mass ratio:* For the Zn electrode without additives, Zn (96.4 wt%) and polyvinylidene fluoride (PVDF) (3.6 wt%) was utilized. For the Zn electrode with Super-P (SP) additive, Zn, (86.0 wt%) SP, (10.4 wt%) and polyvinylidene fluoride (PVDF) (3.6 wt%) was utilized. For the Zn electrode with ZnO additive, Zn, (86.0 wt%) ZnO, (10.4 wt%) and polyvinylidene fluoride (PVDF) (3.6 wt%) was utilized. For the Zn electrode with Bi<sub>2</sub>O<sub>3</sub> additive, Zn, (86.0 wt%) Bi<sub>2</sub>O<sub>3</sub>, (6.2 wt%) and polyvinylidene fluoride (PVDF) (3.6 wt%) was utilized. For the Zn electrode with all the additives, Zn, (69.4 wt%) SP, (10.4 wt%) ZnO, (10.4 wt%) Bi<sub>2</sub>O<sub>3</sub>, (6.2 wt%) and polyvinylidene fluoride (PVDF) (3.6 wt%) was utilized. For the Ag electrode, Ag<sub>2</sub>O (Alfa Aesar) (80.0 wt%), SP (12.0 wt%), and polyvinylidene fluoride (PVDF) (8.0 wt%) was utilized.

## 2. Supplementary Figures

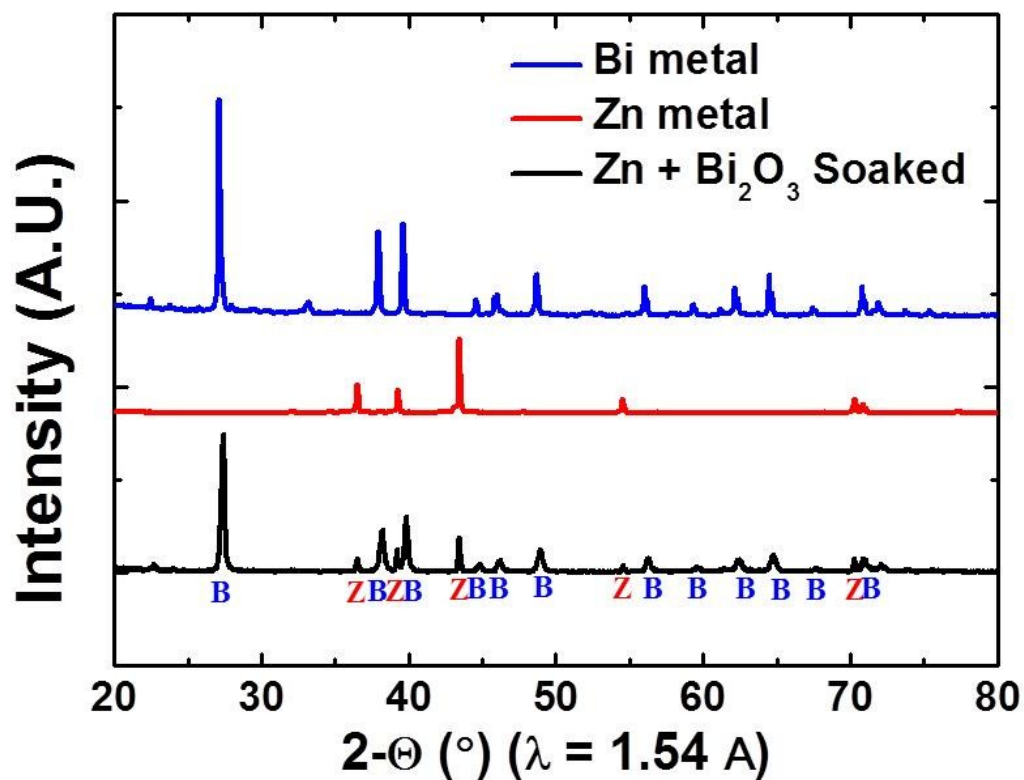

**Figure S1:** Same mass of Zn and Bi<sub>2</sub>O<sub>3</sub> particles are mixed and soaked in the electrolyte. PXRD is obtained after soaking, the Bi<sub>2</sub>O<sub>3</sub> reflections are completely vanished and only Zn and Bi metal reflections are present.

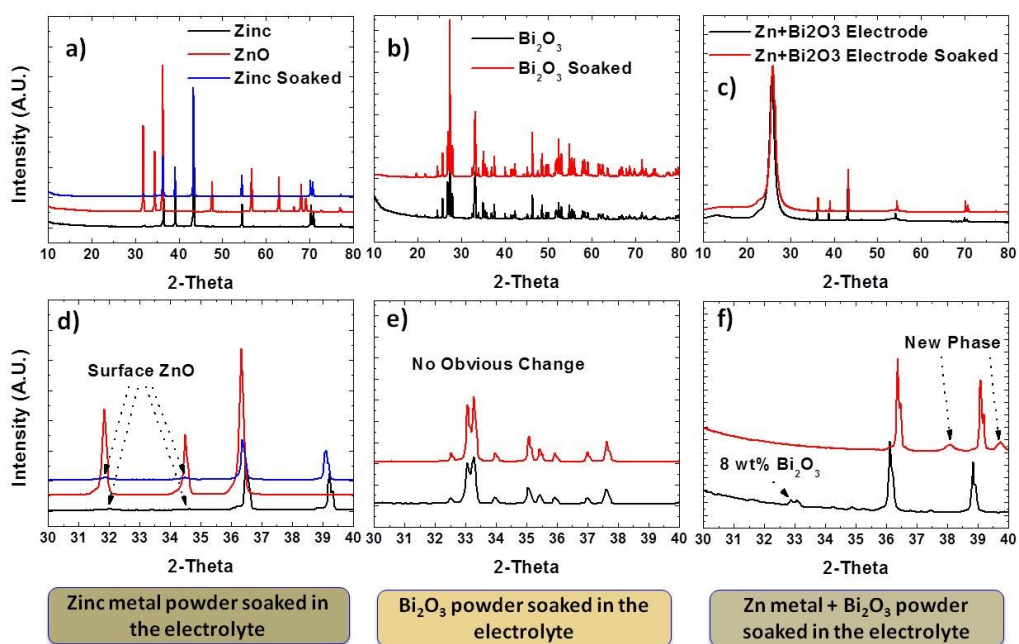

**Figure S2:** a) Wide range and d) narrow range of PXRD of Zn particle soaked in the electrolyte. b) Wide range and e) narrow range of PXRD of  $\text{Bi}_2\text{O}_3$  particle soaked in the electrolyte. c) Wide range and f) narrow range of PXRD of Zn +  $\text{Bi}_2\text{O}_3$  electrode soaked in the electrolyte. The electrode samples contain PVDF polymer binder.

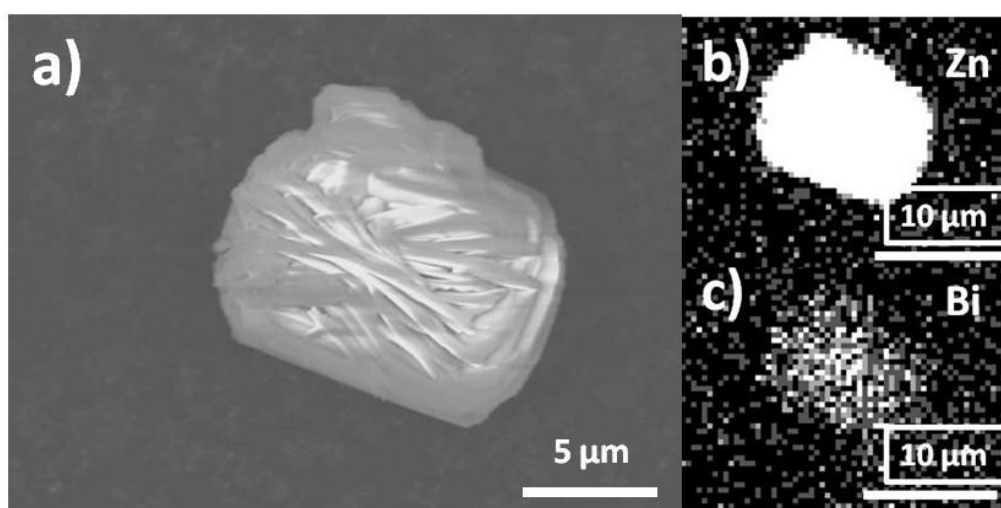

**Figure S3:** a) SEM image of the bismuth species after 50 cycles. b) EDS mapping of Zn  $\text{K}\alpha_1$  and c) Bi  $\text{M}\alpha_1$ . The EDS mapping is performed on the same particle as the SEM image (a).

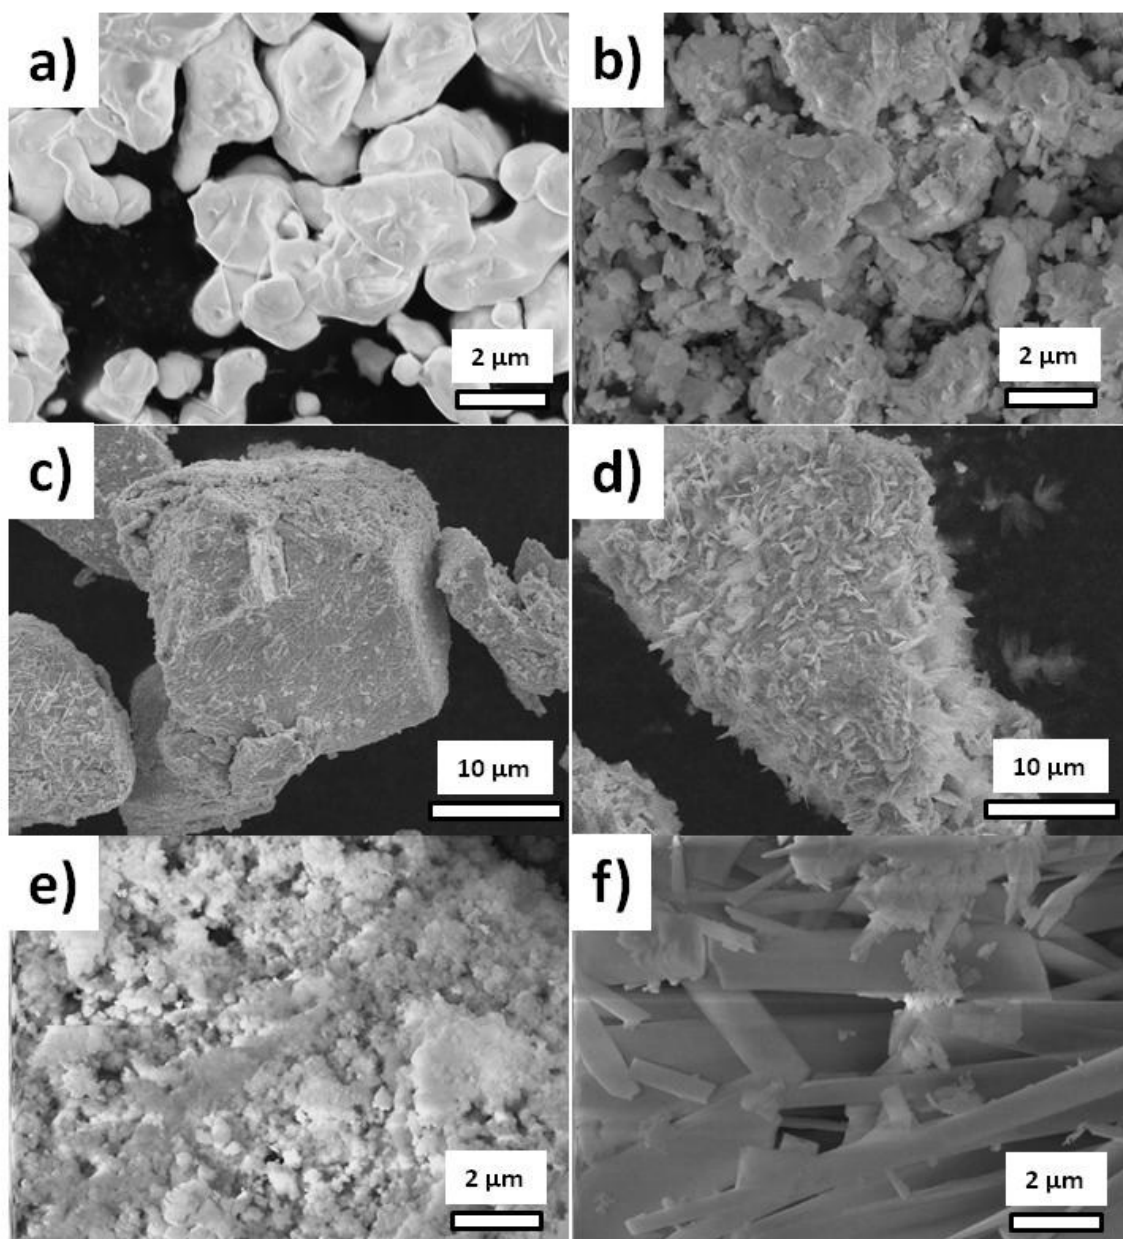

**Figure S4:** SEM images of the pristine a)  $\text{Bi}_2\text{O}_3$ , c) Bi, and e) NiO. SEM images of the b)  $\text{Bi}_2\text{O}_3$  and d) Bi soaked in 6 M  $\text{Zn}(\text{NO}_3)_2$  and f) NiO soaked in 0.5 M  $\text{Cu}(\text{SO}_4)$ . The respective particles in the respective solutions were soaked for overnight. The particles were collected by vacuum filtration and washed with copious amount of D.I. water. Then the samples were loaded onto the SEM holder using the carbon tape. The images were taken using 10 kV energy source.

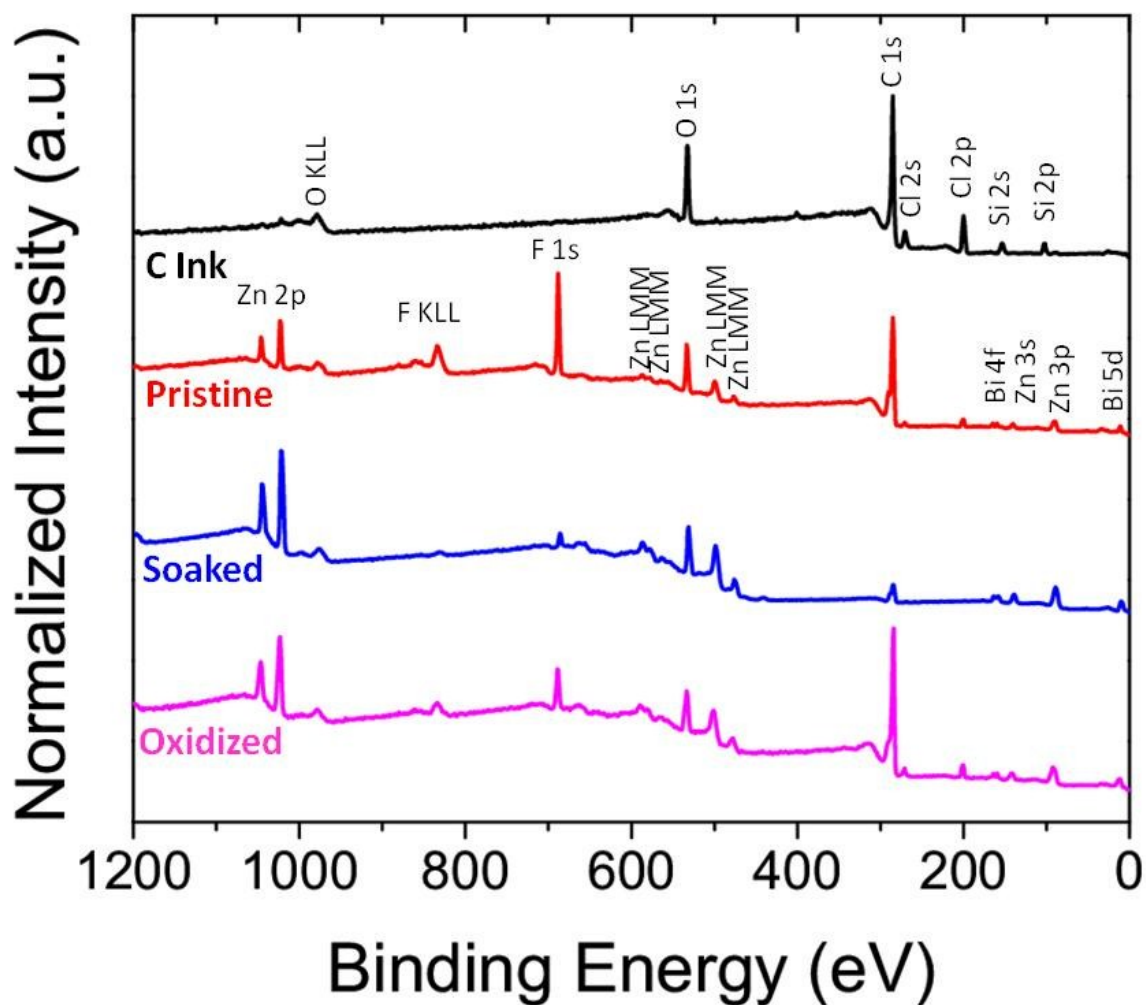

**Figure S5:** Survey scans of the Bi<sub>2</sub>O<sub>3</sub> electrode. All the samples are in the form of electrodes printed on a PET substrate. The pristine sample is the Bi<sub>2</sub>O<sub>3</sub> electrode after curing. The soaked sample is the Bi<sub>2</sub>O<sub>3</sub> electrode after soaking in the electrolyte. The oxidized sample is the Bi<sub>2</sub>O<sub>3</sub> electrode after first electrochemical oxidation or discharge.

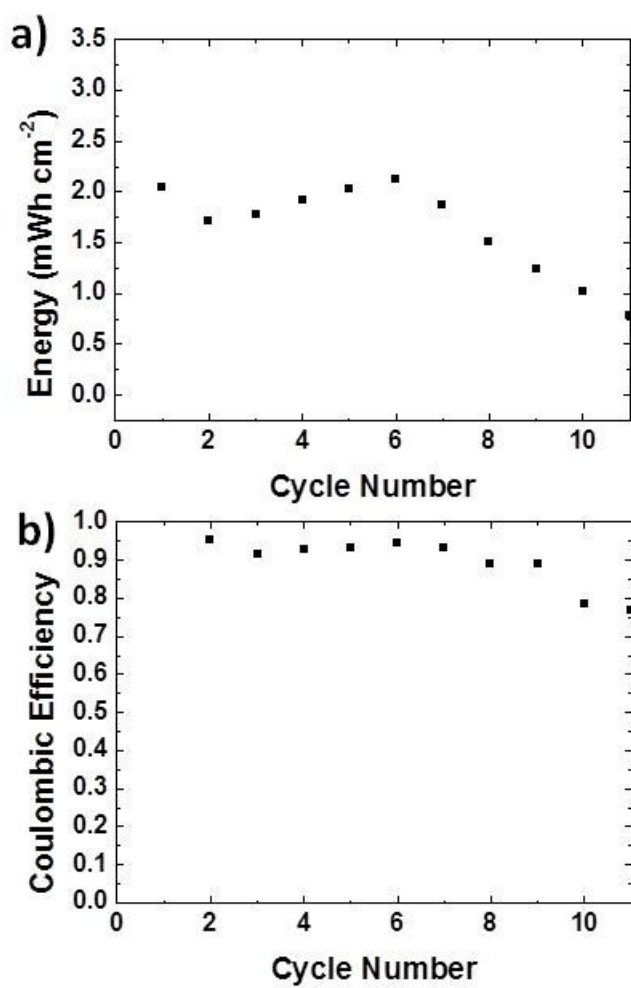

**Figure S6:** a) Energy density and b) coulombic efficiency of Zn-Ag full-cell battery performance with all the additives added in the Zn anode. The full-cell is cycled with current density at 4 mA cm<sup>-2</sup> without a capacity limit.
